# Supplementary material for: Gridded flood depth estimates from satellite-derived inundations
Source: Copernicus journal article supplement (doi:10.5194/nhess-22-1437-2022), 2022-04-21
Supplement: Supplementary file 1 [file nhess-22-1437-2022-supplement.zip]

Archive with 5 entries (5 files):
- Fig. S4 (2022 01 20).pdf
- Fig. S2 (2022 01 20).pdf
- Fig. S1 (2022 01 20).pdf
- nhess-22-1437-2022-supplement-title-page.pdf
- Fig. S3 (2022 01 20).pdf
