# Supplementary material for: Gridded flood depth estimates from satellite-derived inundations
Source: Copernicus journal article supplement (doi:10.5194/nhess-22-1437-2022), 2022-04-21
Supplement: Supplementary file 1 [file nhess-22-1437-2022-supplement.zip › Fig. S1 (2022 01 20).pdf]

Figure S1  
Rivière des Prairies at Montreal, Quebec — May 2017 Flood  
Tool Data Inputs

The Floods in Canada (FiC) layer was obtained from the FiC data repository (<https://open.canada.ca/data/en/dataset/08b810c2-7c81-40f1-adb1-c32c8a2c9f50>) using the scene from May 9th, 2017.  
The 'CanadianBuildingFootprints' layer was obtained by extracting centroids from microsoft/CanadianBuildingFootprints project data (<https://github.com/microsoft/CanadianBuildingFootprints>) on July 26, 2021.  
The High-Resolution Digital Elevation Model (HRDEM) layer was obtained from HRDEM Mosaic WCS server (<https://open.canada.ca/data/en/dataset/0fe65119-e96e-4a57-8bfe-9d9245fba06b>) on July 26, 2021.  
'Levee-protected Areas' are described in the text.

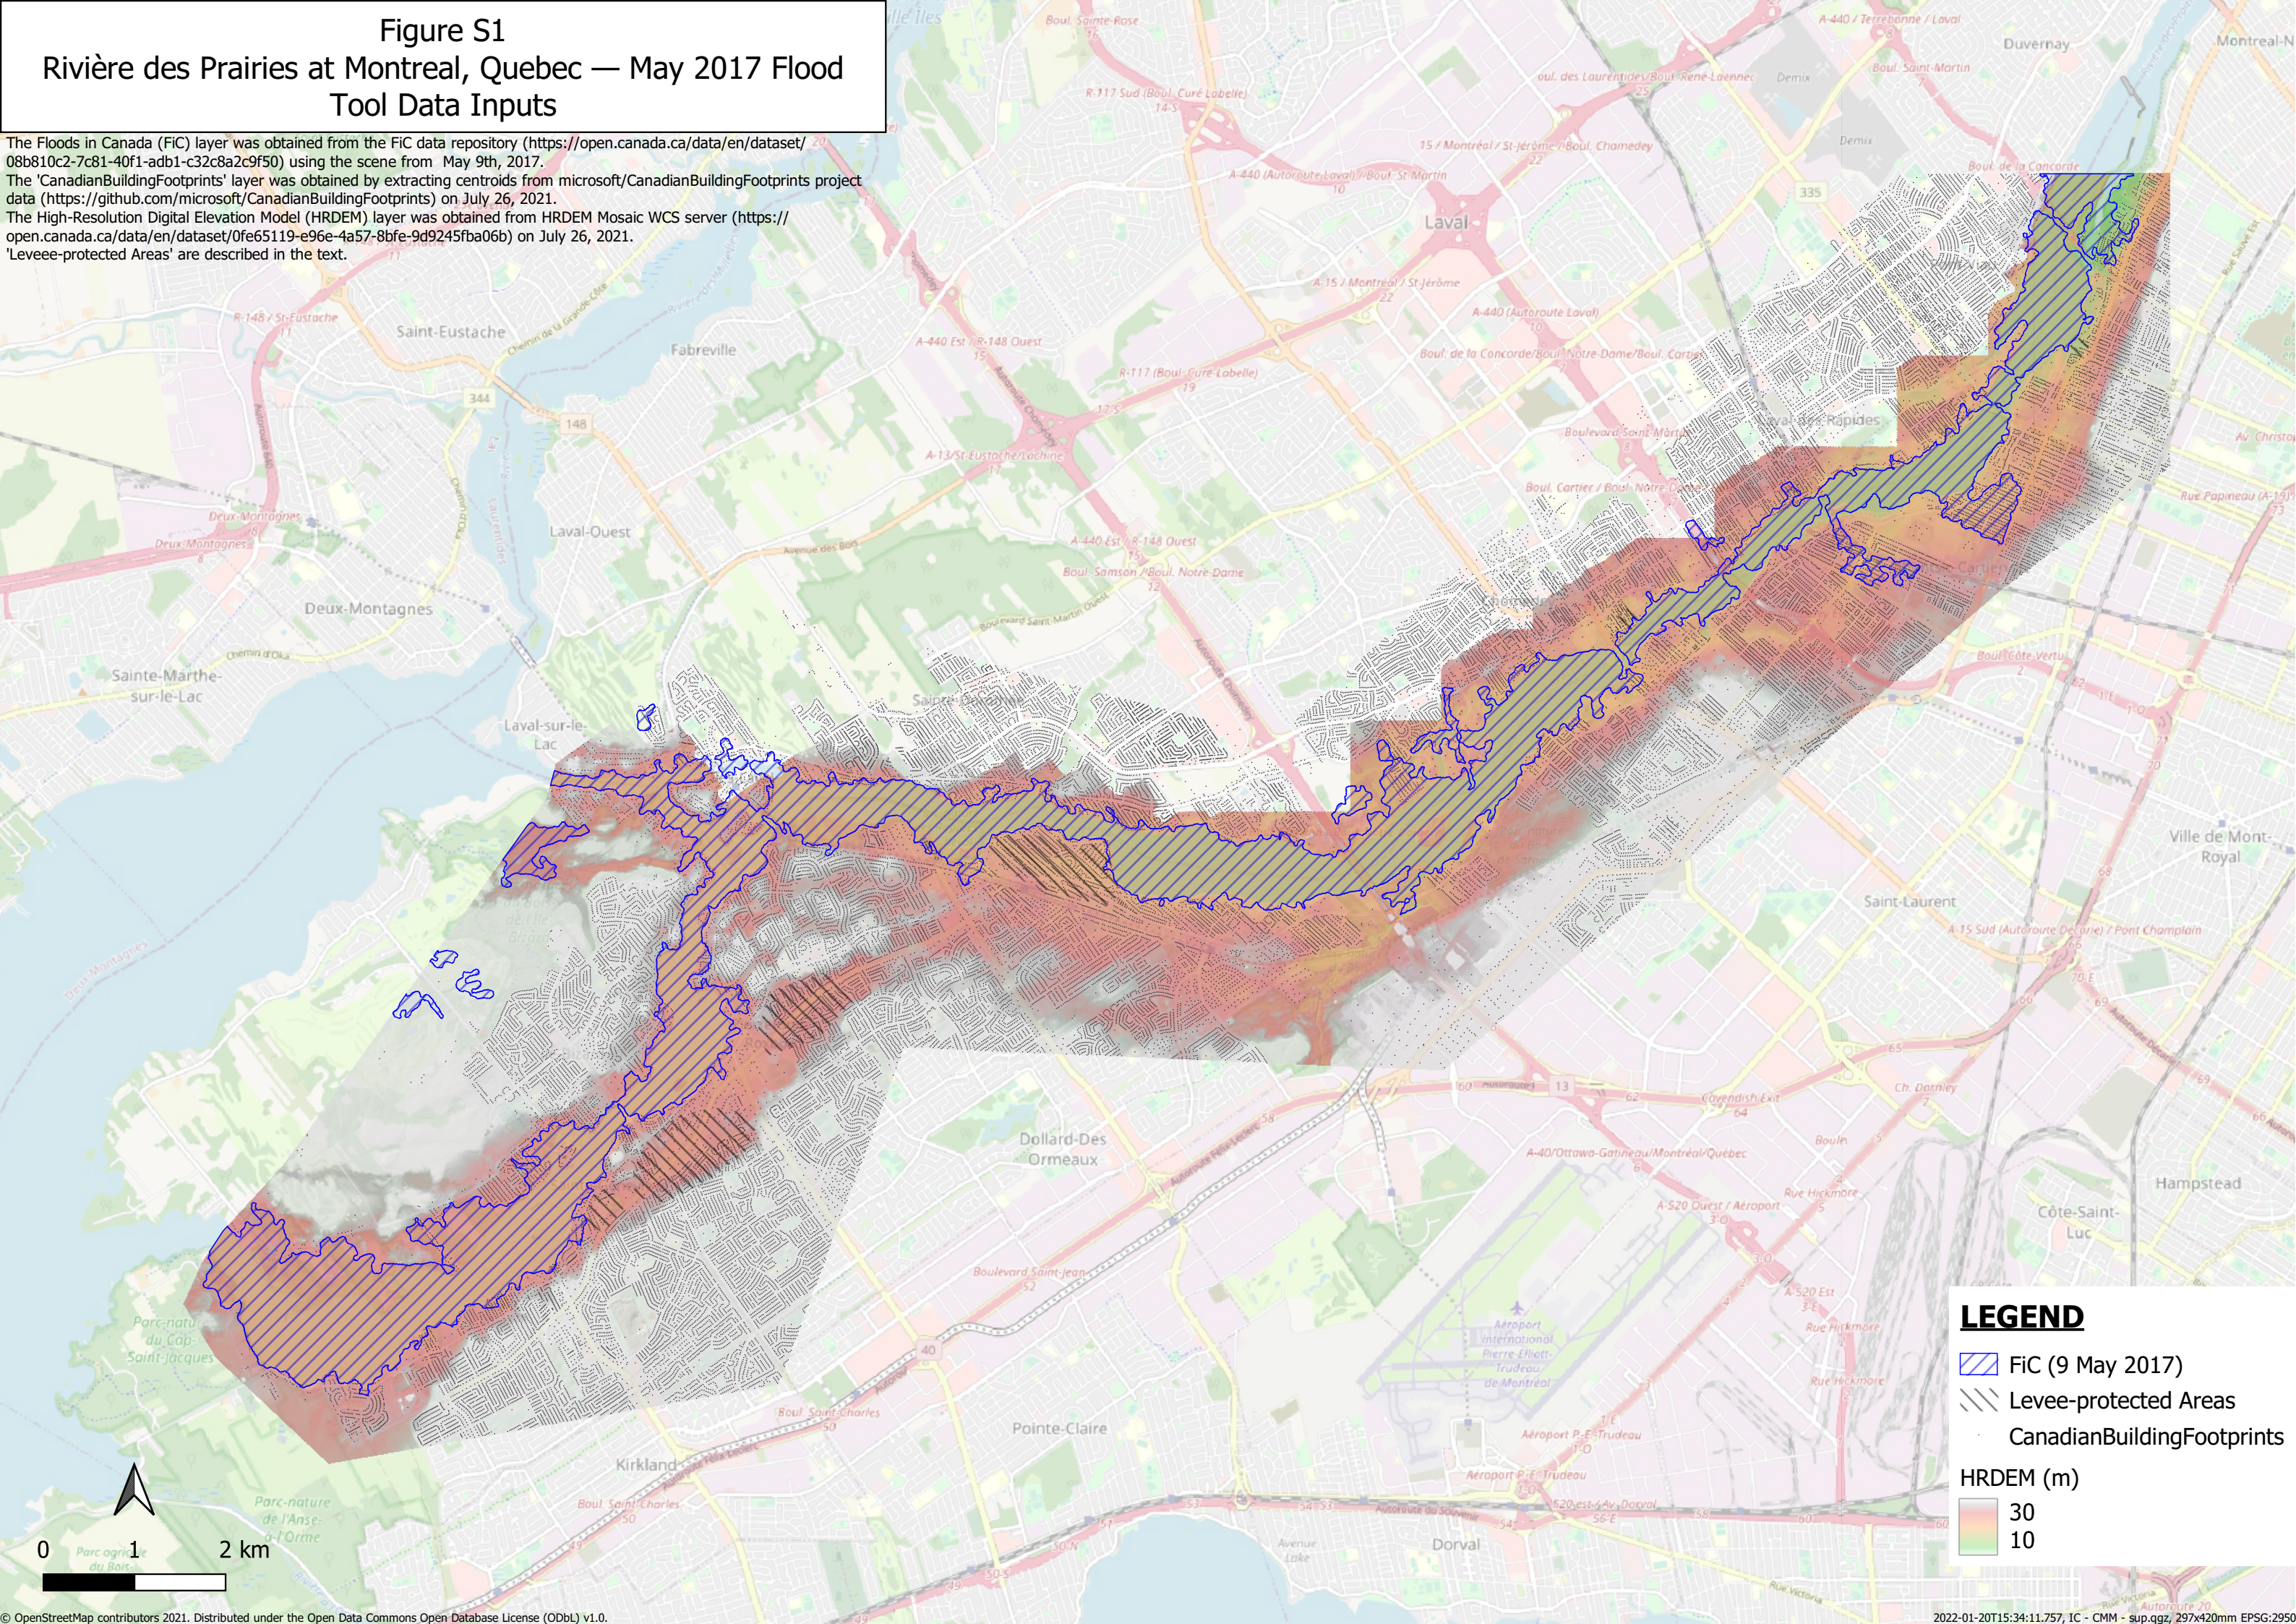

## LEGEND

FiC (9 May 2017)

Levee-protected Areas

CanadianBuildingFootprints

HRDEM (m)

30

10
