# Supplementary material for: Gridded flood depth estimates from satellite-derived inundations
Source: Copernicus journal article supplement (doi:10.5194/nhess-22-1437-2022), 2022-04-21
Supplement: Supplementary file 1 [file nhess-22-1437-2022-supplement.zip › Fig. S2 (2022 01 20).pdf]

Figure S2

Saint John River at Fredericton, New Brunswick — May 2018 Flood Data Inputs

The Floods in Canada (FIC) layer was obtained from the FIC data repository (<https://open.canada.ca/data/en/dataset/08b810c2-7c81-40f1-adb1-c32c8a2c9f50>) using the scene from May 3rd, 2018.

The 'CanadianBuildingFootprints' layer was obtained by extracting centroids from microsoft/CanadianBuildingFootprints project data (<https://github.com/microsoft/CanadianBuildingFootprints>) on July 26, 2021.

The High-Resolution Digital Elevation Model (HRDEM) layer was obtained from HRDEM Mosaic WCS server (<https://open.canada.ca/data/en/dataset/0fe65119-e96e-4a57-8bfe-9d9245fba06b>) on July 26, 2021.

The 'Trusted Depths (SJ\_PoNB)' layer was obtained from GeoNB servers (<http://www.snb.ca/geonb1/e/DC/floodraahf.asp>) on May 15th, 2021.

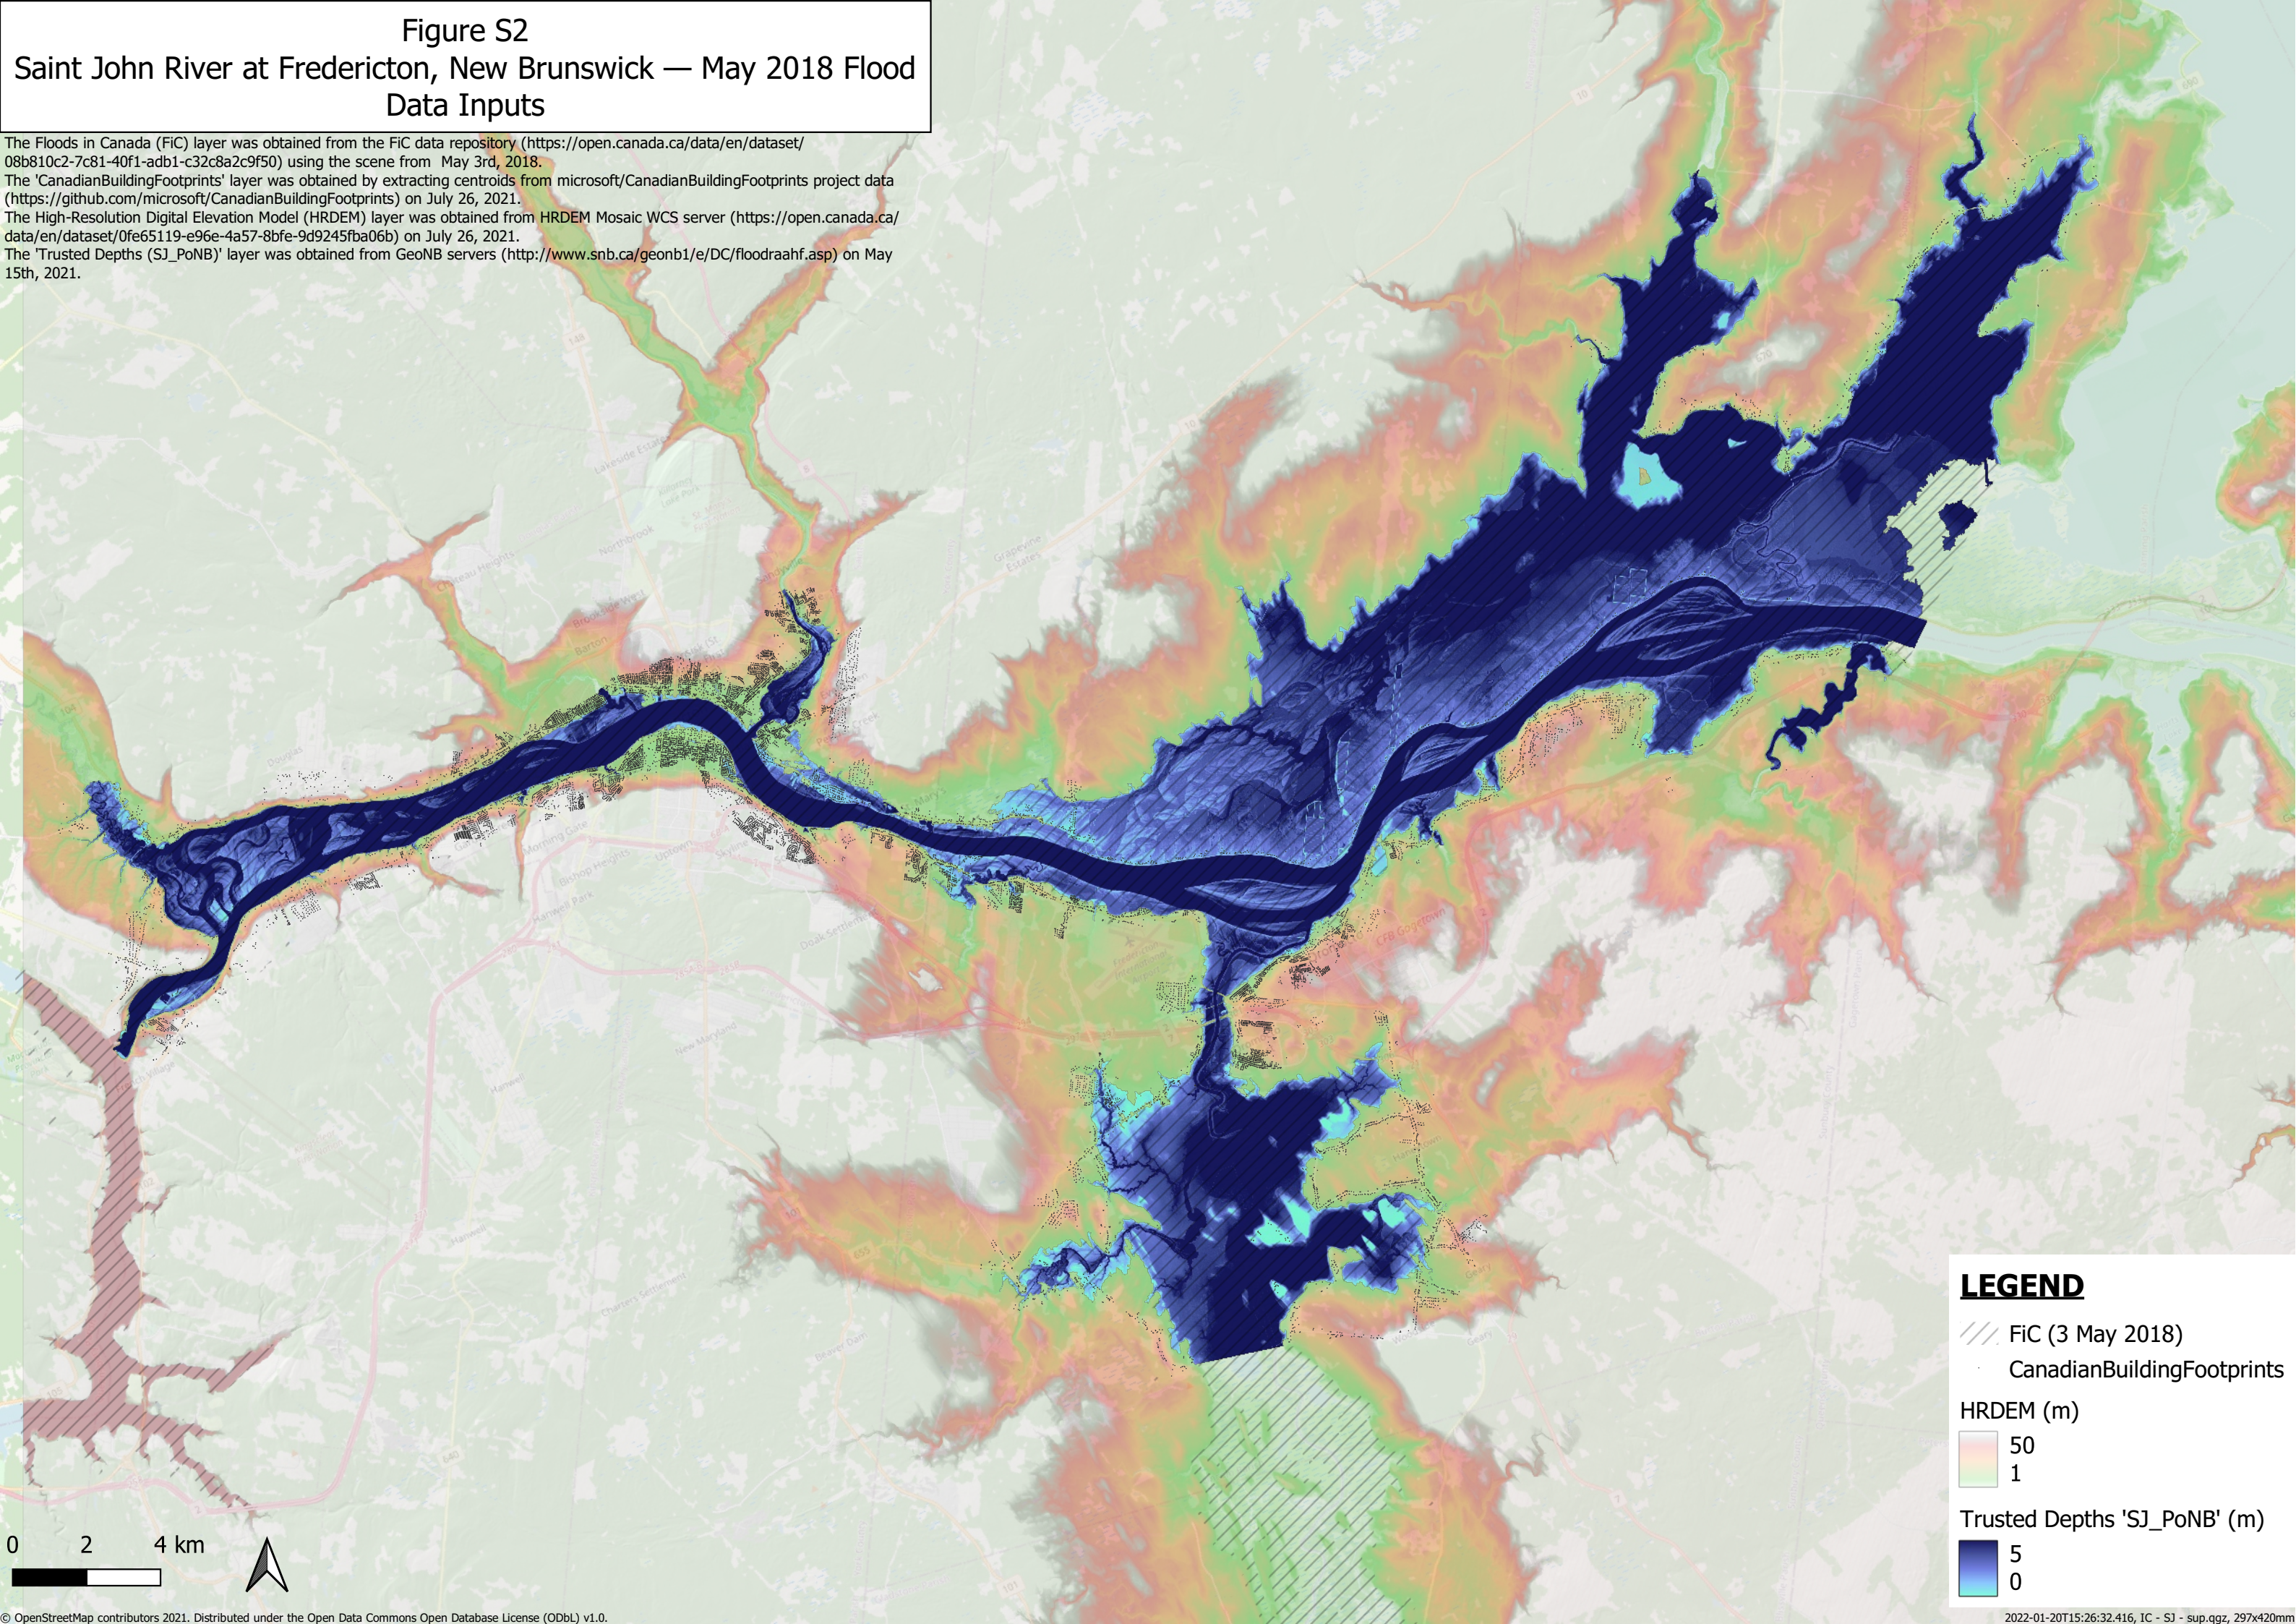

**LEGEND**

- /// FIC (3 May 2018)
- CanadianBuildingFootprints
- HRDEM (m)
  - 50
  - 1
- Trusted Depths 'SJ\_PoNB' (m)
  - 5
  - 0
