# Supplementary material for: Gridded flood depth estimates from satellite-derived inundations
Source: Copernicus journal article supplement (doi:10.5194/nhess-22-1437-2022), 2022-04-21

Figure S3  
Rivière des Prairies at Montreal, Quebec — May 2017 Flood  
Depth Grid Results

The Floods in Canada (FIC) layer was obtained from the FIC data repository (<https://open.canada.ca/data/en/dataset/08b810c2-7c81-40f1-adb1-c32c8a2c9f50>) using the scene from May 9th, 2017.  
The High-Resolution Digital Elevation Model (HRDEM) layer was obtained from HRDEM Mosaic WCS server (<https://open.canada.ca/data/en/dataset/0fe65119-e96e-4a57-8bfe-9d9245fba06b>) on July 26, 2021.  
'Depth Results' layers are described in the text.

FwDET-QGIS  
(dP\_FQ)

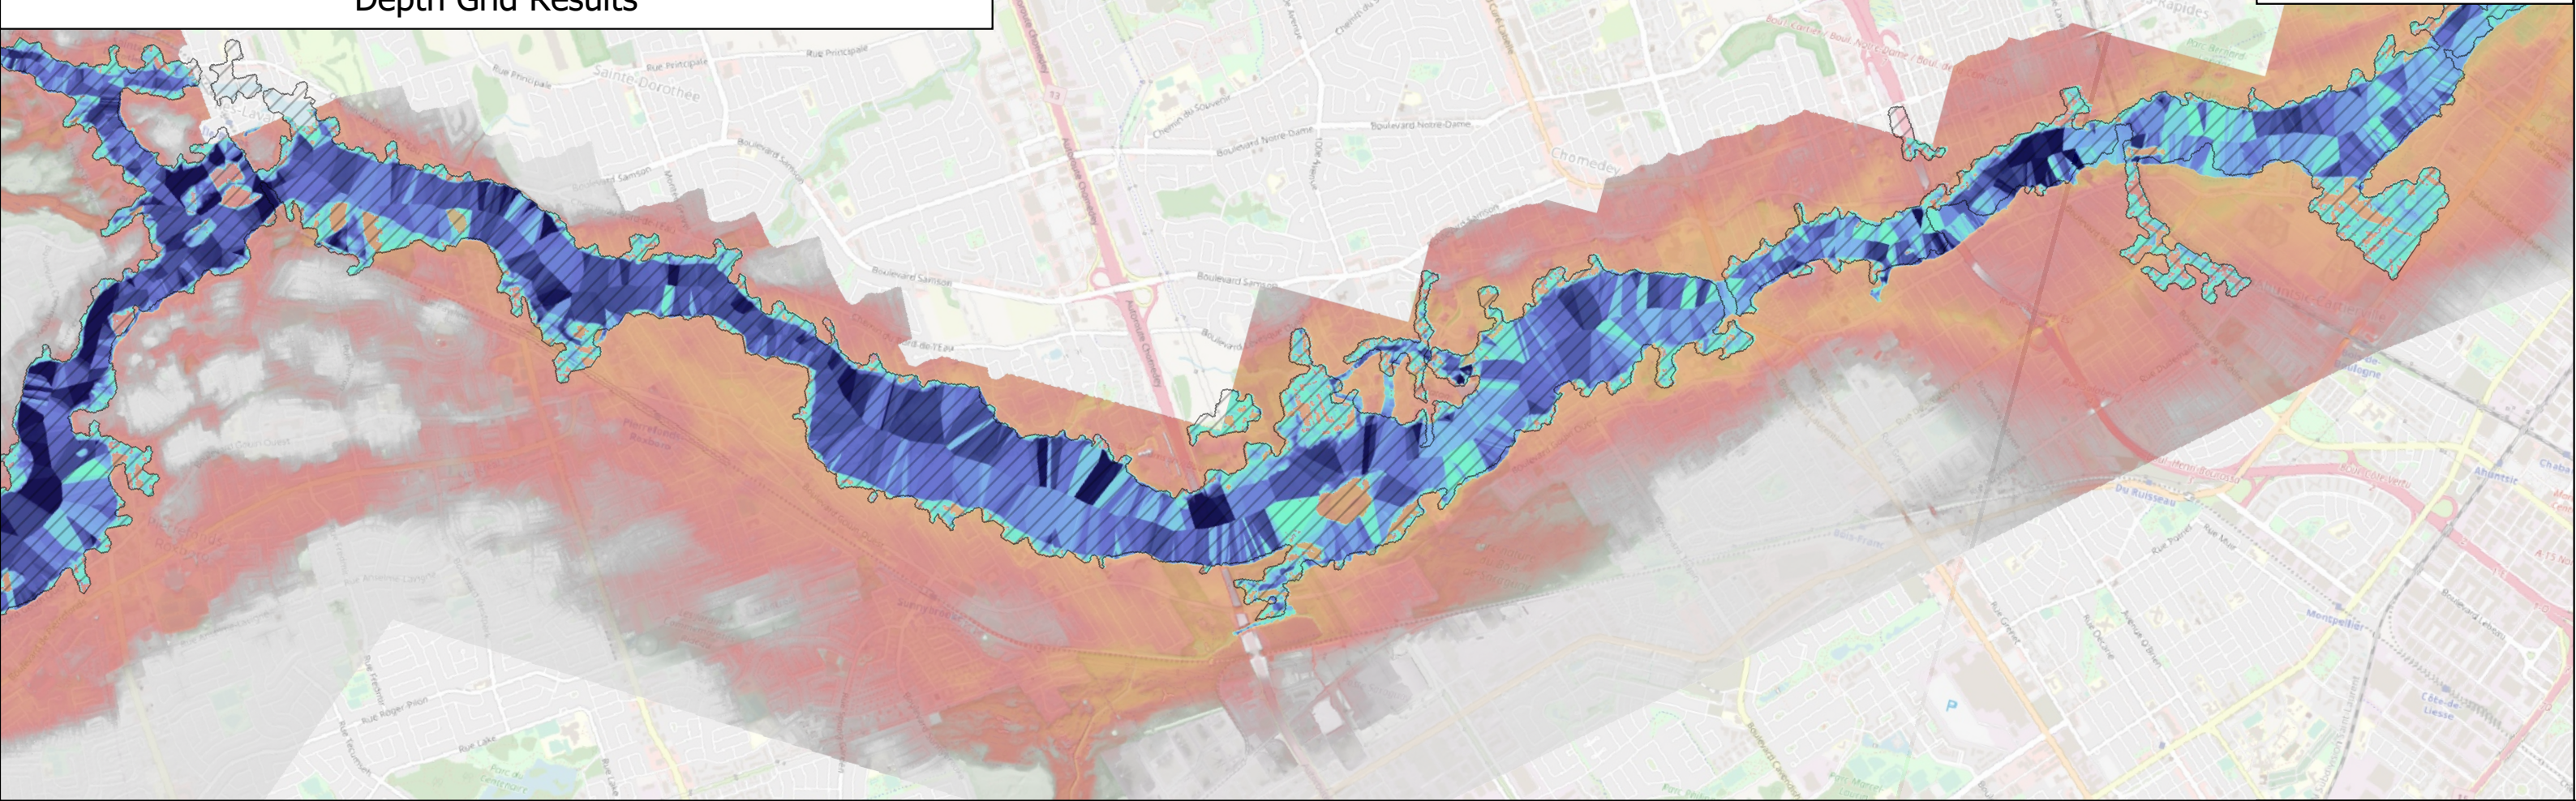

RICorDE  
(dP\_RIC)

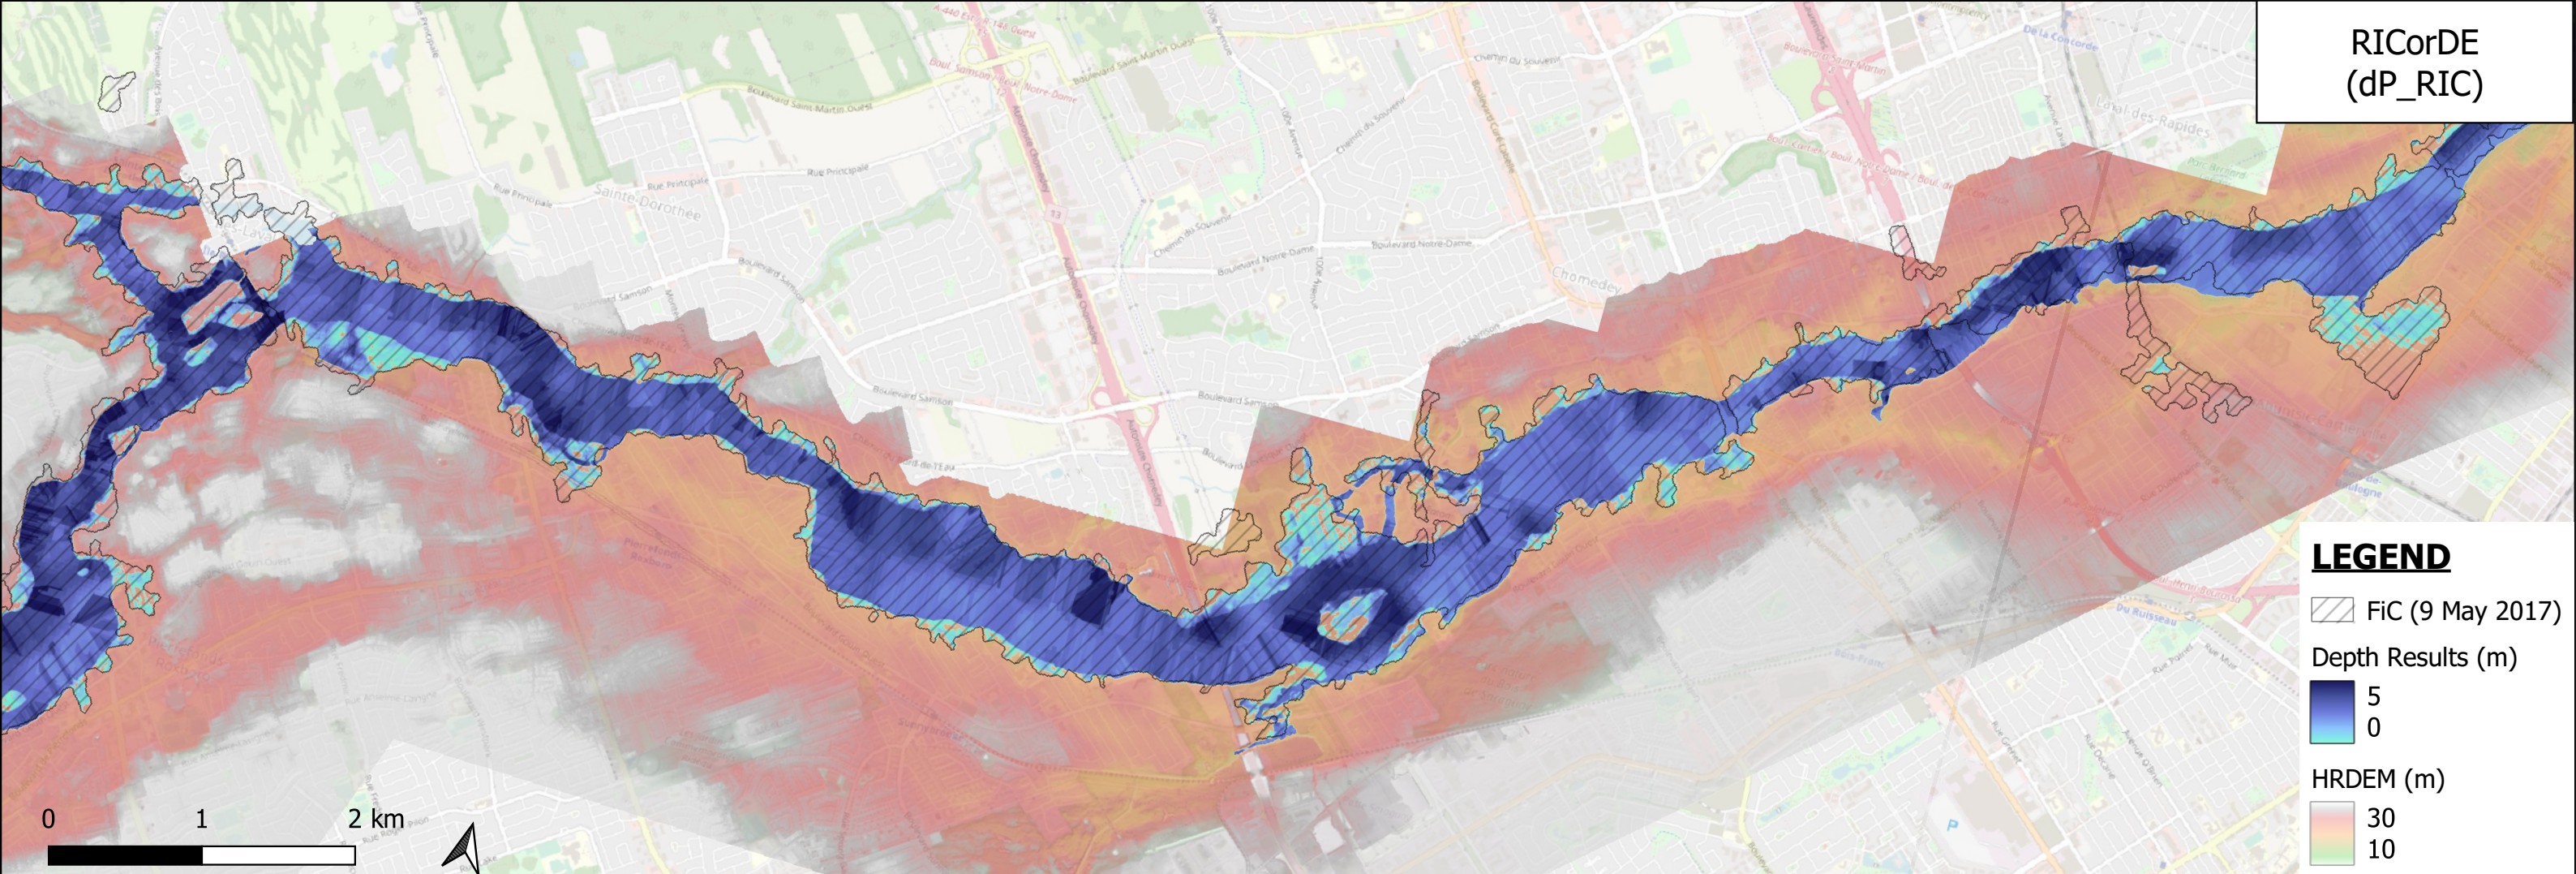

**LEGEND**

- FIC (9 May 2017)
- Depth Results (m)
  - 5
  - 0
- HRDEM (m)
  - 30
  - 10

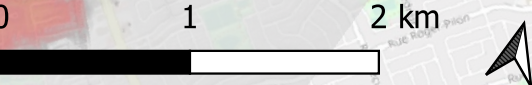

Supplement: Supplementary file 1 [file nhess-22-1437-2022-supplement.zip › Fig. S3 (2022 01 20).pdf]
