# Supplementary material for: Gridded flood depth estimates from satellite-derived inundations
Source: Copernicus journal article supplement (doi:10.5194/nhess-22-1437-2022), 2022-04-21
Supplement: Supplementary file 1 [file nhess-22-1437-2022-supplement.zip › Fig. S4 (2022 01 20).pdf]

Figure S4

Saint John River at Fredericton, New Brunswick — May 2018 Flood  
Depth Grid Results

FwDET-QGIS  
(SJ\_FQ)

The Floods in Canada (FiC) layer was obtained from the FiC data repository (<https://open.canada.ca/data/en/dataset/08b810c2-7c81-40f1-adb1-c32c8a2c9f50>) using the scene from May 3rd, 2018.  
The High-Resolution Digital Elevation Model (HRDEM) layer was obtained from HRDEM Mosaic WCS server (<https://open.canada.ca/data/en/dataset/0fe65119-e96e-4a57-8bfe-9d9245fba06b>) on July 26, 2021.  
'Depth Results' layers are described in the text.

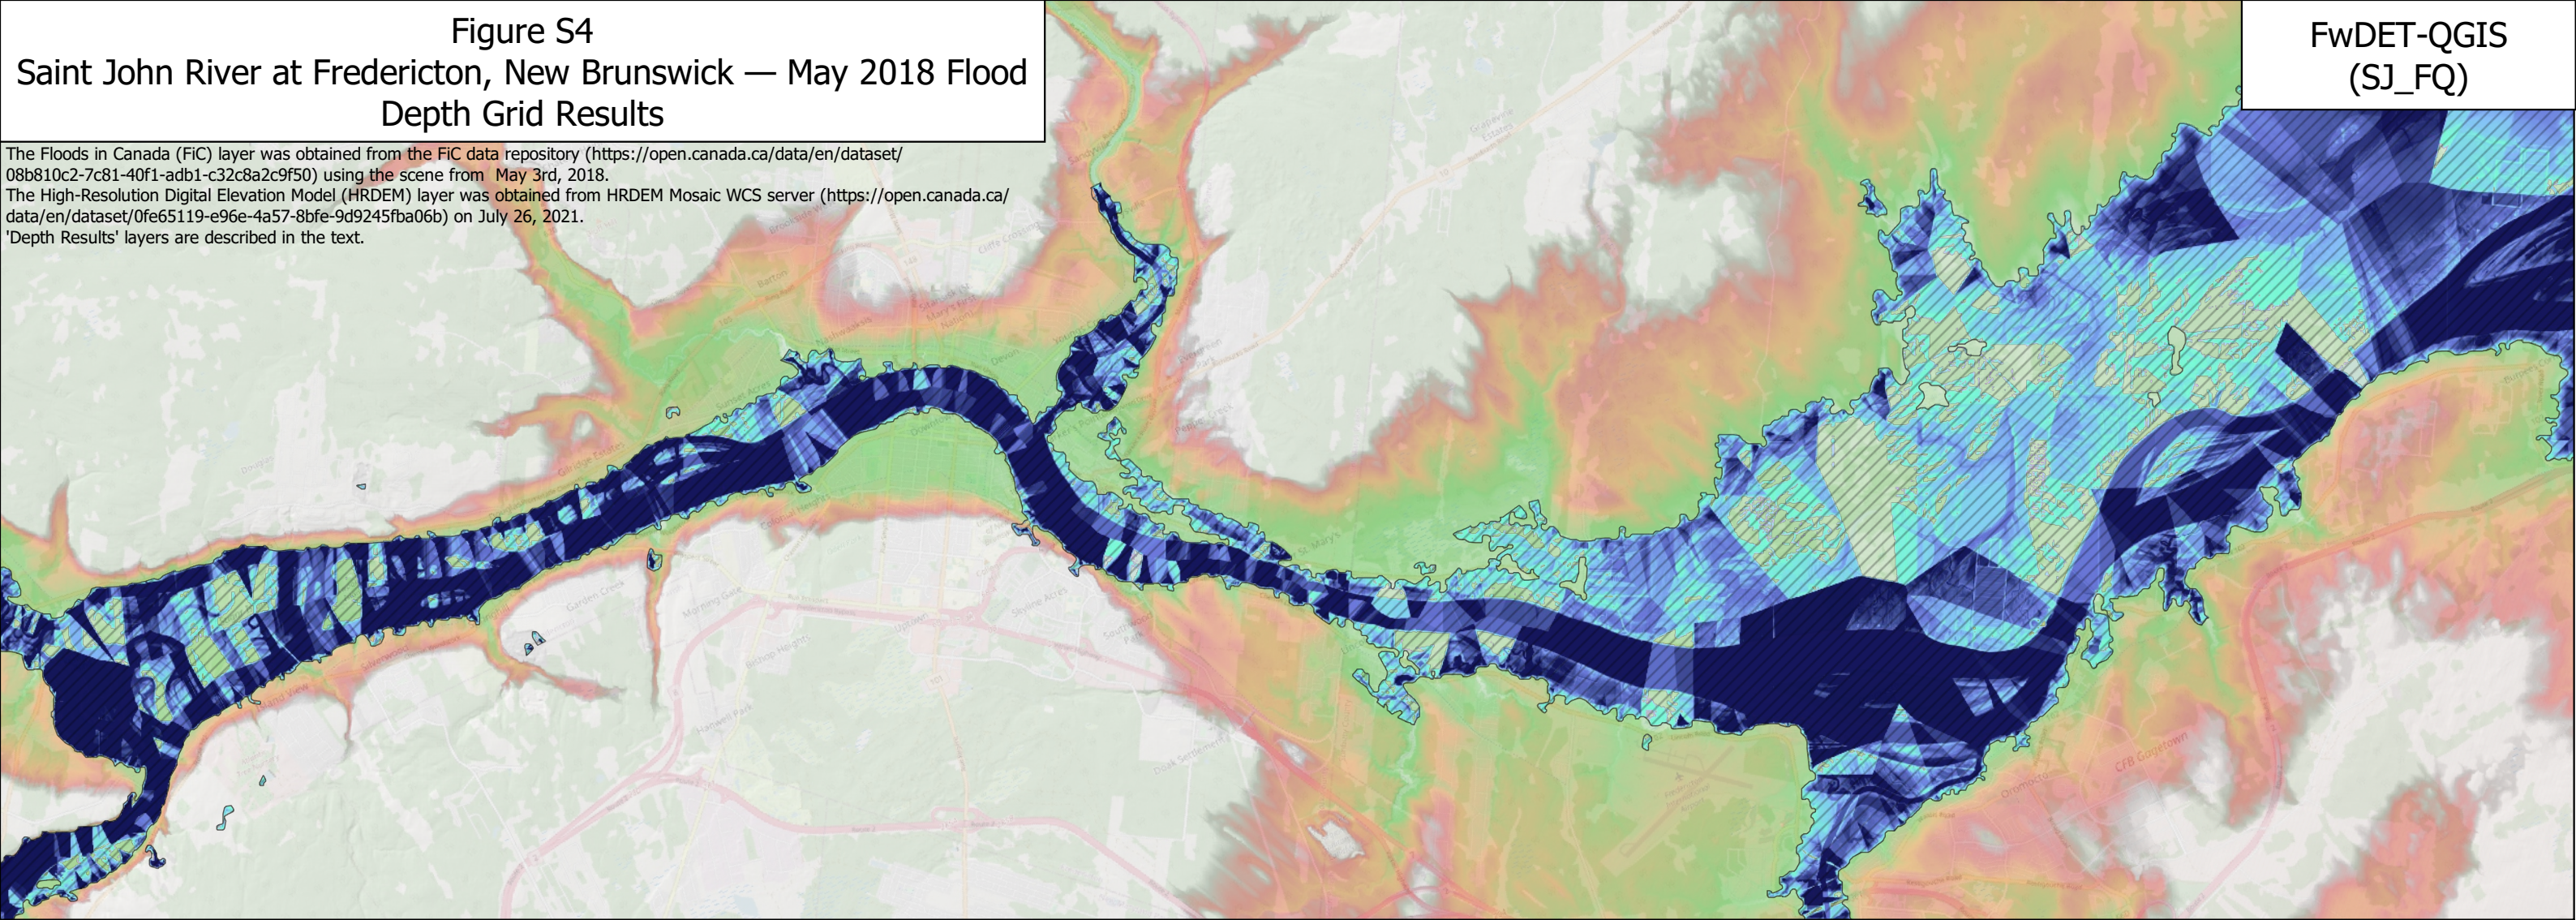

RICorDE  
(SJ\_RIC)

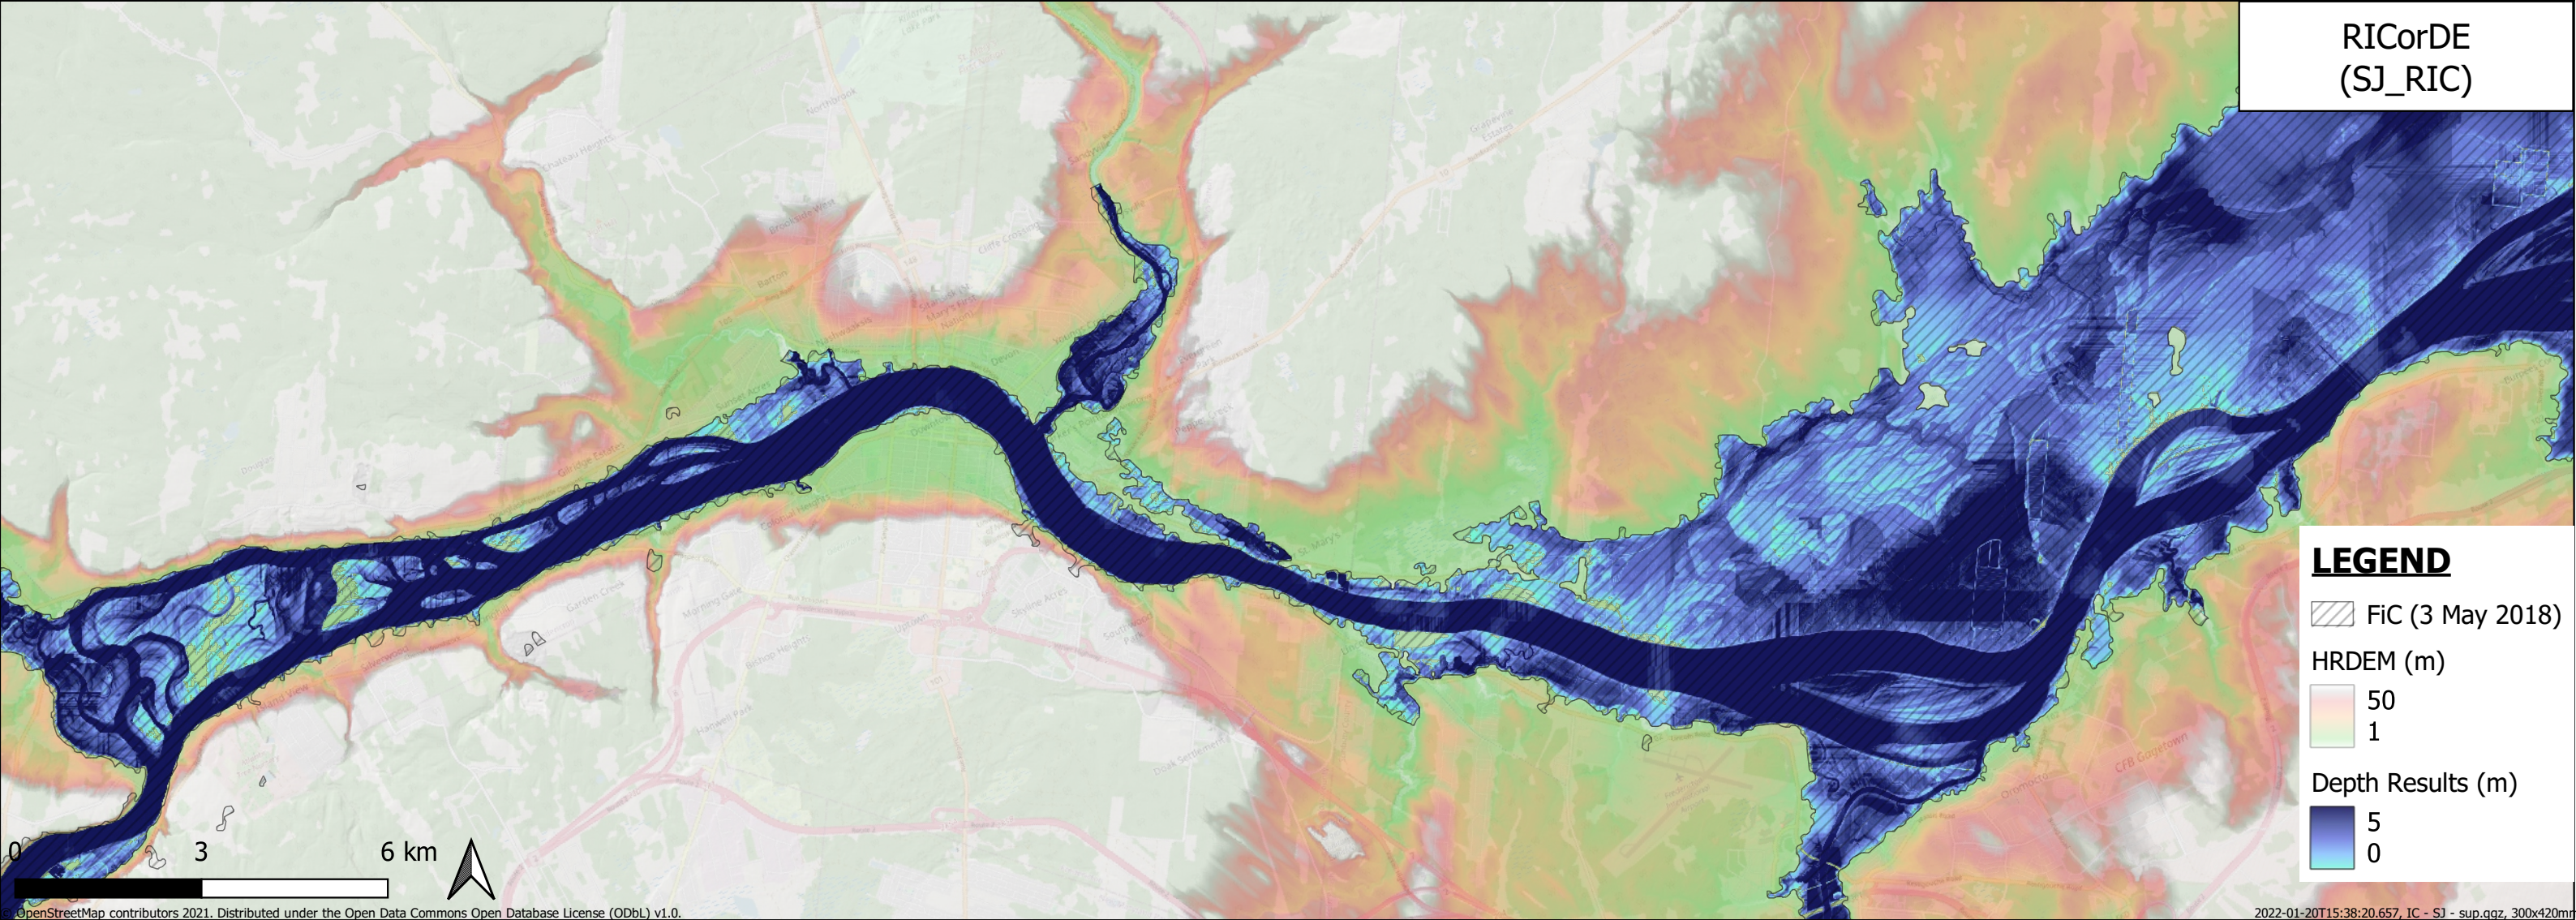

**LEGEND**

FiC (3 May 2018)

HRDEM (m)

50

1

Depth Results (m)

5

0
