# Supplementary material for: Gridded flood depth estimates from satellite-derived inundations
Source: Copernicus journal article supplement (doi:10.5194/nhess-22-1437-2022), 2022-04-21
Supplement: Supplementary file 1 [file nhess-22-1437-2022-supplement.zip › nhess-22-1437-2022-supplement-title-page.pdf]

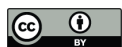

## *Supplement of*

# **Gridded flood depth estimates from satellite-derived inundations**

**Seth Bryant et al.**

*Correspondence to:* Seth Bryant ([seth.bryant@gfz-potsdam.de](mailto:seth.bryant@gfz-potsdam.de))

- [nhess-22-1437-2022-supplement-title-page.pdf](#)
- [Fig. S1 \(2022 01 20\).pdf](#)
- [Fig. S2 \(2022 01 20\).pdf](#)
- [Fig. S3 \(2022 01 20\).pdf](#)
- [Fig. S4 \(2022 01 20\).pdf](#)

The copyright of individual parts of the supplement might differ from the article licence.
